# Supplementary material for: Functionalized halloysite multivalent glycocluster as a new drug delivery system
Source: Royal Society of Chemistry journal article supplement (doi:10.1039/c4tb01272k), 2014-09-29
Supplement: c4tb01272k1.pdf [file c4tb01272k1.pdf]

## SUPPORTING INFORMATIONS

# Functionalized halloysite multivalent glycocluster as a new drug delivery system

M. Massaro, S. Riela, P. Lo Meo,<sup>a</sup>R. Noto, G. Cavallaro, S. Milioto, and G. Lazzara

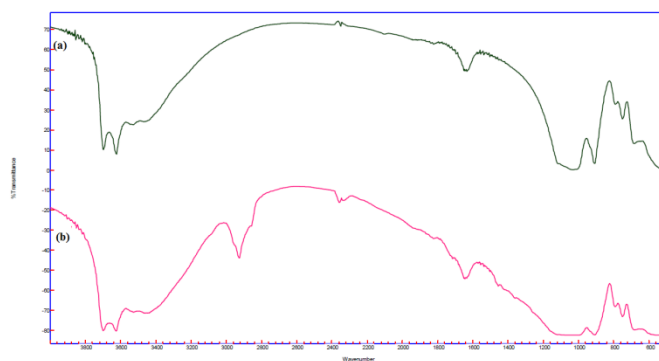

Figure S1. IR spectra of (a) pristine HNT and (b) **7a** compound.

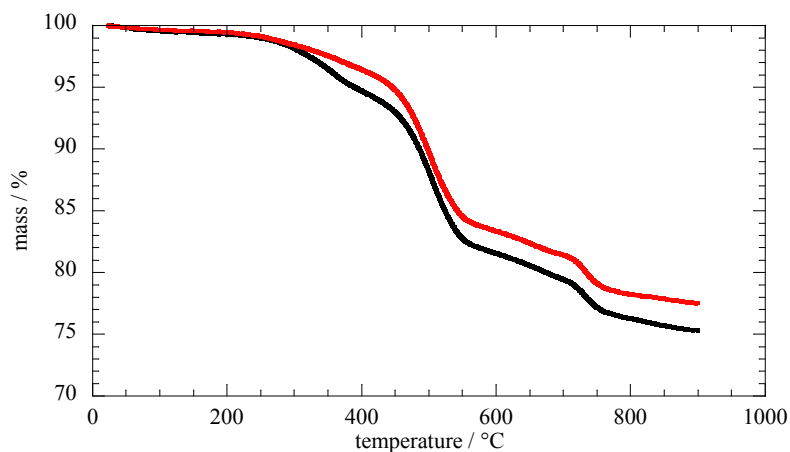

Figure S2. Thermograms of **3** (red line) and **7a** (black line).

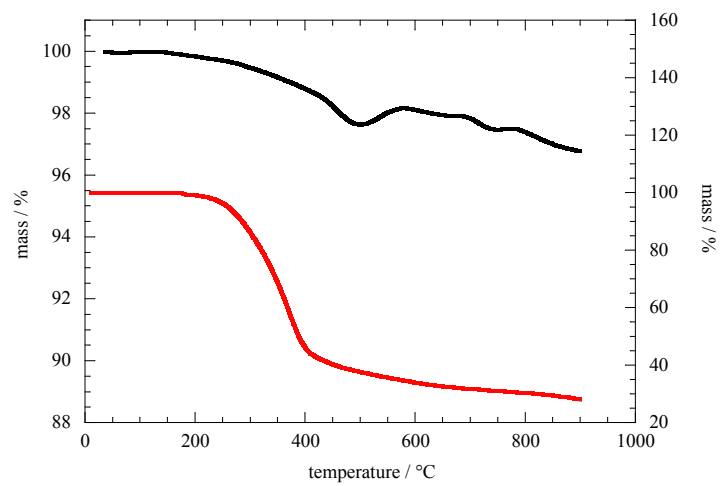

*Figure S3.* Thermograms of curcumin (red line) and **7a**/Curc complex (black line).
